# Supplementary material
Source: publisher figshare collection journal article supplement (https://acs.figshare.com/ndownloader/files/10817204)
Supplement: Supplementary file 1 [file 10817204]

## SUPPORTING INFORMATION

### Carbon Capture by Metal Oxides: Unleashing the Potential of the (111) Facet

Greg A. Mutch,<sup>\*,†,‡</sup> Sarah Shulda,<sup>§</sup> Alan J. McCue,<sup>‡</sup> Martin J. Menart,<sup>§</sup> Cristian V. Ciobanu,<sup>||</sup> Chilan Ngo,<sup>§</sup> James A. Anderson,<sup>‡</sup> Ryan M. Richards<sup>§</sup> and David Vega-Maza<sup>‡</sup>

<sup>†</sup>School of Engineering, Newcastle University, Newcastle upon Tyne NE1 7RU, United Kingdom.

<sup>‡</sup>School of Engineering, University of Aberdeen, Aberdeen AB24 3FX, United Kingdom.

<sup>§</sup>Department of Chemistry and Geochemistry, Colorado School of Mines, Golden, Colorado 80401, United States.

<sup>||</sup>Department of Mechanical Engineering and Materials Science Program, Colorado School of Mines, Golden, Colorado 80401, United States.

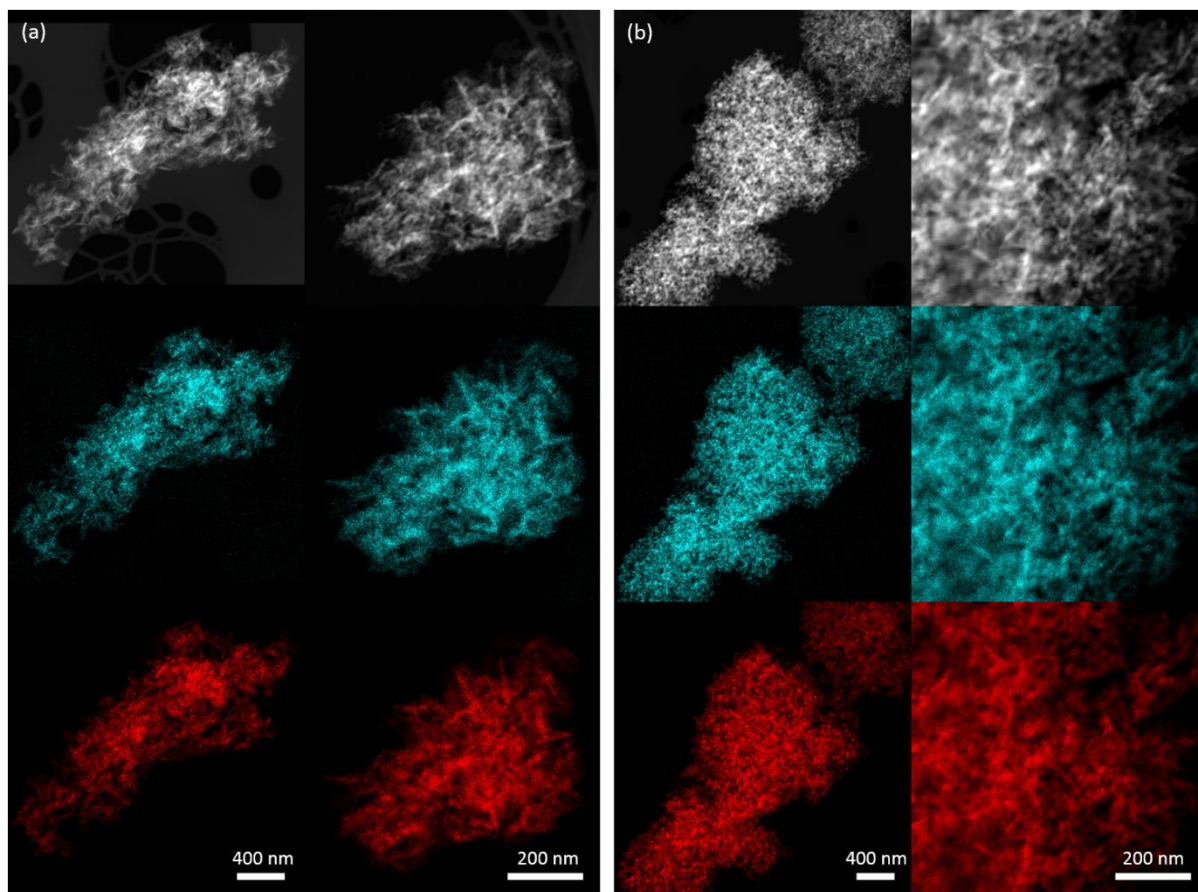

**Figure S1.** Scanning transmission electron microscopy (STEM) and energy dispersive X-ray spectroscopy (EDS) for (a) MgO(111) and (b) MgO(111) 800°C. Morphology and compositional homogeneity remain consistent after heat treatment. (STEM = White, O = Blue, Mg = Red).

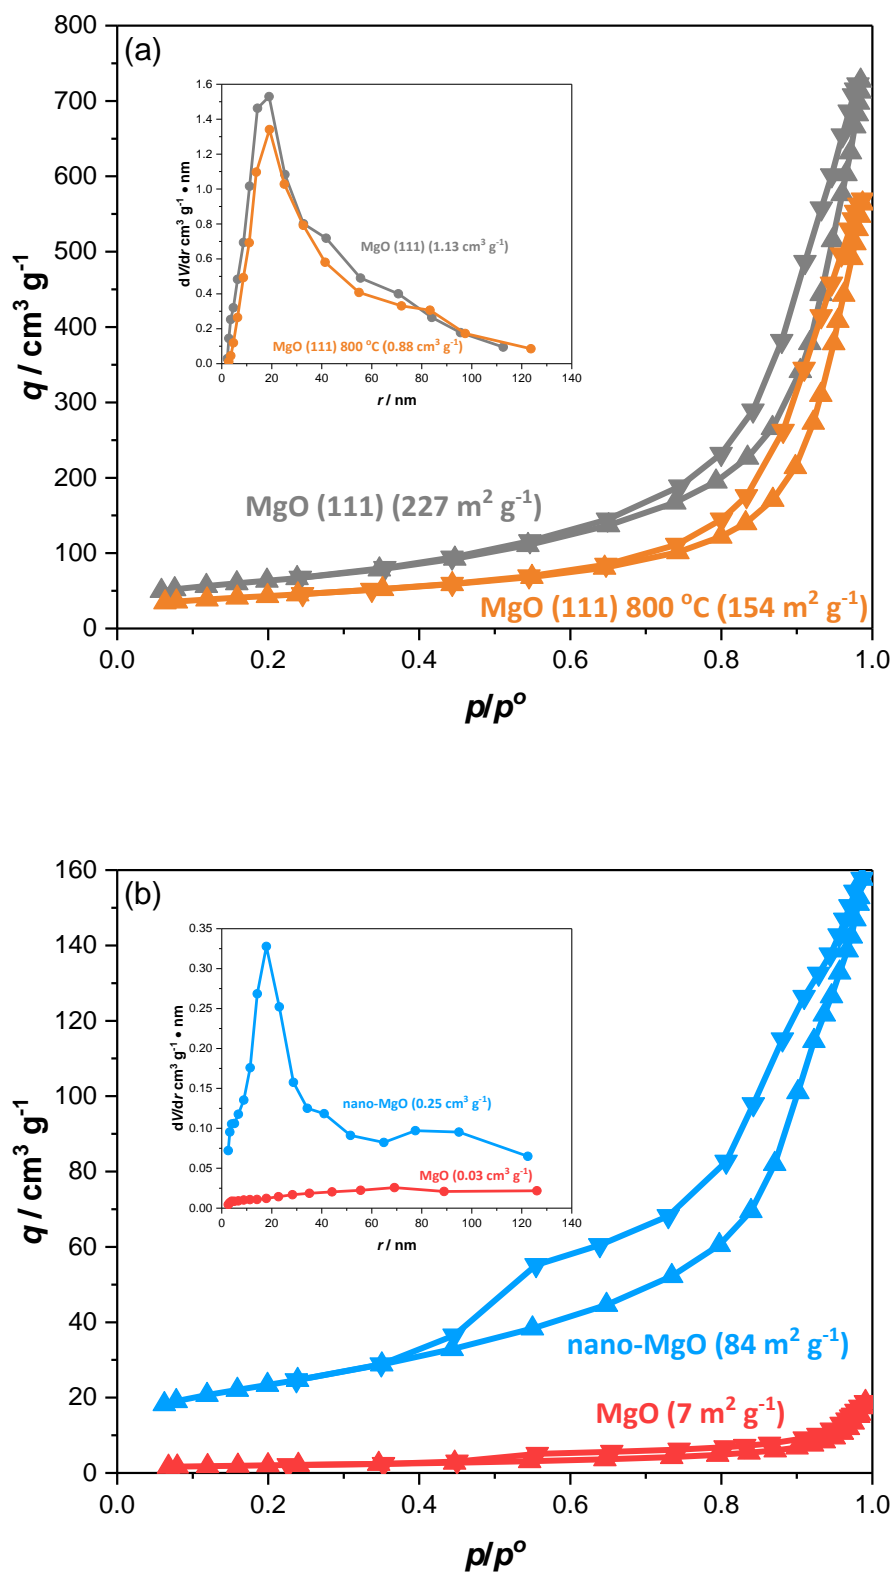

**Figure S2.** Nitrogen adsorption-desorption isotherms and pore size distributions (inset) for (a) MgO(111) and MgO(111) 800°C and (b) nano-MgO and MgO. Specific surface area values, as determined by the BET method are inset as well as pore volumes as determined by the BJH method.

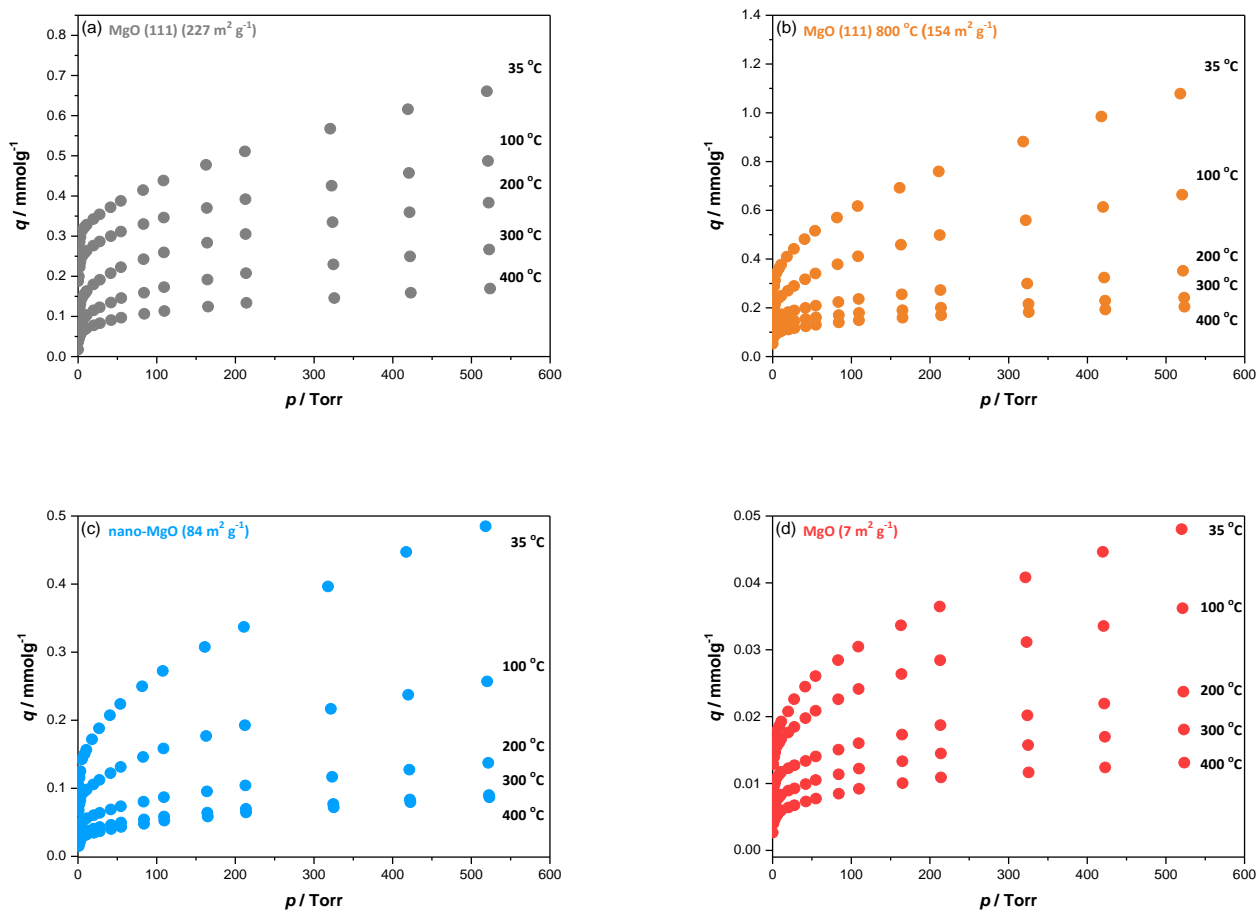

**Figure S3.** CO<sub>2</sub> adsorption isotherms for (a) MgO(111), (b) MgO(111) 800°C, (c) nano-MgO and (d) MgO with specific surface areas inset.  $T_{\text{ads}}$  = 35, 100, 200, 300 and 400°C and  $p_{\text{CO}_2}$  = 0.05 – 520 Torr.

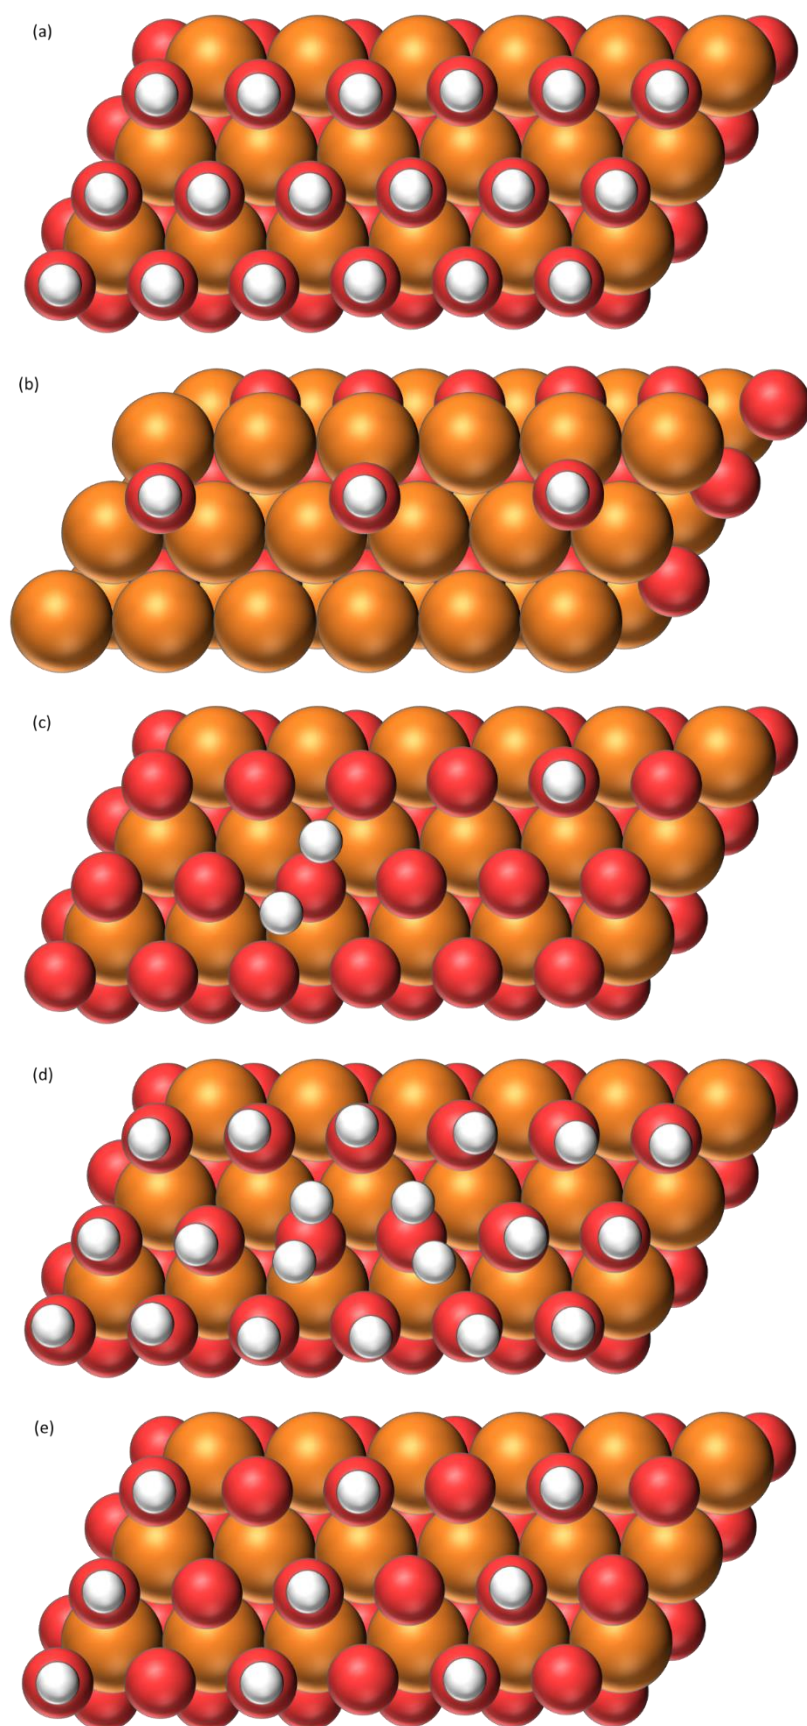

**Figure S4.** Top view configurations of hydroxyl and water on a 6x3 MgO(111) surface cell for DFT calculations. (a) 100% H-covered O-terminated surface, (b) low coverage of OH Mg-terminated surface, (c) one water and one OH O-terminated surface, (d) two waters on otherwise H-covered O-terminated surface and (e) 50% H-covered O-terminated surface. (Mg = Orange, O = Red and H = White).

**Table S1.** Basic site quantification for MgO(111) and MgO(111) 800°C, as determined by CO<sub>2</sub>-TPD, with weak ( $T_d < 120^\circ\text{C}$ ), intermediate ( $T_d = 120 - 275^\circ\text{C}$ ) and strong ( $T_d > 275^\circ\text{C}$ ) basic sites, as well as total.

| Sample            | Basic sites at desorption temperature ( $T_d$ ) [ $\mu\text{mol g}^{-1}$ ] |                                |                            | Total |
|-------------------|----------------------------------------------------------------------------|--------------------------------|----------------------------|-------|
|                   | < 120 [ $^\circ\text{C}$ ]                                                 | 120 – 275 [ $^\circ\text{C}$ ] | > 275 [ $^\circ\text{C}$ ] |       |
| MgO(111)          | 121                                                                        | 184                            | 52                         | 357   |
| MgO(111)<br>800°C | 122                                                                        | 240                            | 55                         | 415   |
